# Supplementary material for: Association between family functions and antenatal depression symptoms: a cross-sectional study among pregnant women in urban communities of Hengyang city, China
Source: PubMed Central journal article supplement — BMJ Open. 2020 Aug 5;10(8):e036557. doi: 10.1136/bmjopen-2019-036557 (PMC7409968; doi:10.1136/bmjopen-2019-036557), 2020-08-05
Supplement: bmjopen-2019-036557.draft_revisions.pdf [file bmjopen-2019-036557.draft_revisions.pdf]

# BMJ Open

BMJ Open is committed to open peer review. As part of this commitment we make the peer review history of every article we publish publicly available.

When an article is published we post the peer reviewers' comments and the authors' responses online. We also post the versions of the paper that were used during peer review. These are the versions that the peer review comments apply to.

The versions of the paper that follow are the versions that were submitted during the peer review process. They are not the versions of record or the final published versions. They should not be cited or distributed as the published version of this manuscript.

BMJ Open is an open access journal and the full, final, typeset and author-corrected version of record of the manuscript is available on our site with no access controls, subscription charges or pay-per-view fees (<http://bmjopen.bmj.com>).

If you have any questions on BMJ Open's open peer review process please email [info.bmjopen@bmj.com](mailto:info.bmjopen@bmj.com)

# BMJ Open

## Effects of family functions on antenatal depression symptoms among women in the third trimester of pregnancy: Self-efficacy as a partial mediator

|                               |                                                                                                                                                                                                                                                                                                                                                                                                                                                                                                                                                                                                                                                                                                                                                                                    |
|-------------------------------|------------------------------------------------------------------------------------------------------------------------------------------------------------------------------------------------------------------------------------------------------------------------------------------------------------------------------------------------------------------------------------------------------------------------------------------------------------------------------------------------------------------------------------------------------------------------------------------------------------------------------------------------------------------------------------------------------------------------------------------------------------------------------------|
| Journal:                      | <i>BMJ Open</i>                                                                                                                                                                                                                                                                                                                                                                                                                                                                                                                                                                                                                                                                                                                                                                    |
| Manuscript ID                 | bmjopen-2019-036557                                                                                                                                                                                                                                                                                                                                                                                                                                                                                                                                                                                                                                                                                                                                                                |
| Article Type:                 | Original research                                                                                                                                                                                                                                                                                                                                                                                                                                                                                                                                                                                                                                                                                                                                                                  |
| Date Submitted by the Author: | 19-Dec-2019                                                                                                                                                                                                                                                                                                                                                                                                                                                                                                                                                                                                                                                                                                                                                                        |
| Complete List of Authors:     | Zheng, Baohua; Central South University Xiangya School of Public Health, Department of Social Medicine and Health Management<br>Zhu, Xidi; Central South University Xiangya School of Public Health, Department of Social Medicine and Health Management<br>Yu, Yunhan; Central South University Xiangya School of Public Health, Department of Social Medicine and Health Management<br>Hu, Zhao; Central South University Xiangya School of Public Health, Zhou, Wensu; Central South University, Social Medicine and Health Management, Xiangya School of Public Health;<br>Yin, Shilin; Central South University Xiangya School of Public Health<br>Xu, Huilan; Central South University Xiangya School of Public Health, Department of Social Medicine and Health Management, |
| Keywords:                     | OBSTETRICS, Depression & mood disorders < PSYCHIATRY, SOCIAL MEDICINE                                                                                                                                                                                                                                                                                                                                                                                                                                                                                                                                                                                                                                                                                                              |
|                               |                                                                                                                                                                                                                                                                                                                                                                                                                                                                                                                                                                                                                                                                                                                                                                                    |

SCHOLARONE™  
Manuscripts

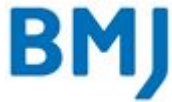

I, the Submitting Author has the right to grant and does grant on behalf of all authors of the Work (as defined in the below author licence), an exclusive licence and/or a non-exclusive licence for contributions from authors who are: i) UK Crown employees; ii) where BMJ has agreed a CC-BY licence shall apply, and/or iii) in accordance with the terms applicable for US Federal Government officers or employees acting as part of their official duties; on a worldwide, perpetual, irrevocable, royalty-free basis to BMJ Publishing Group Ltd ("BMJ") its licensees and where the relevant Journal is co-owned by BMJ to the co-owners of the Journal, to publish the Work in this journal and any other BMJ products and to exploit all rights, as set out in our [licence](#).

The Submitting Author accepts and understands that any supply made under these terms is made by BMJ to the Submitting Author unless you are acting as an employee on behalf of your employer or a postgraduate student of an affiliated institution which is paying any applicable article publishing charge ("APC") for Open Access articles. Where the Submitting Author wishes to make the Work available on an Open Access basis (and intends to pay the relevant APC), the terms of reuse of such Open Access shall be governed by a Creative Commons licence – details of these licences and which [Creative Commons](#) licence will apply to this Work are set out in our licence referred to above.

Other than as permitted in any relevant BMJ Author's Self Archiving Policies, I confirm this Work has not been accepted for publication elsewhere, is not being considered for publication elsewhere and does not duplicate material already published. I confirm all authors consent to publication of this Work and authorise the granting of this licence.

# Effects of family functions on antenatal depression symptoms among women in the third trimester of pregnancy: Self-efficacy as a partially mediator

Baohua Zheng<sup>1</sup>, YunHan Yu<sup>1</sup>, Xidi Zhu<sup>1</sup>, Zhao Hu<sup>1</sup>, WenSu Zhou<sup>1</sup>, ShiLin Yin<sup>1</sup>, HuiLan Xu<sup>1\*</sup>

<sup>1</sup> Department of Social Medicine and Health Management, Xiangya School of Public Health, Central South University, Changsha, China.

\*Correspondence to

Dr Huilan Xu;

[xhlxuhuilan@163.com](mailto:xhlxuhuilan@163.com)

## Abstract

**Objective:** To explore the prevalence of depressive symptoms among pregnant women during their third trimester, and completely evaluate the relationship between family functions and the antenatal depressive symptoms.

**Design:** Community-based, cross-sectional study was conducted among women during the third trimester of pregnancy.

**Setting:** This study was conducted among pregnant women registered at community health service centers of urban Hengyang City, Hunan Province, China from July to October, 2019.

**Participants:** A population-based sample of 813 people aged between 17 and 54 years was selected in 14 randomized communities by multi-staged cluster random sampling method.

**Main outcome measures:** The Family Adaptation Partnership Growth Affection and Resolve Index ( APGAR ) , the General Self-efficacy Scale (GSES) and Patient Health Questionnaire ( PHQ-9 ) were used to access family functions, self-efficacy and depression symptoms, respectively.

**Results:** The prevalence of antenatal depression symptoms is 9.2%. Self-efficacy level partially mediated the relationship between family functions and depressive symptoms( $\beta=-0.05$ , 95%CI: -0.07to -0.03,  $p < 0.05$ ), and the mediating effect accounted for 17.09% of the total effect.

**Conclusions:** The mediating effect of self-efficacy on the relationship of family functions and antenatal depression symptoms among women in the third trimester of pregnancy was found in this study.

**Keywords :** antenatal depression symptoms ; self-efficacy ; family functions ; China

## Strengths and limitations of this study

- Antenatal depression symptoms would directly affect the health of the pregnant women, which also indirectly led to adverse pregnancy outcomes and did harm to the health of the next generation. Most of the studies focused on postnatal depression and there is less data available on antenatal depression among women in the third trimester of pregnancy.
- This study aimed to assess the prevalence of antenatal depressive symptoms among women in the third trimester of pregnancy, and completely evaluate the effect of self-efficacy correction between family functions and the antenatal depressive symptoms. This study provides evidence and support for identifying high-risk pregnant women with emotional problems in order to take early intervention measures.
- The cross-sectional study limited the ability to make causal inferences. Also, the finding might be

1  
2  
3 42 affected by inevitable reporting bias.

4  
5 43 **Word count : 2903**

6  
7 44

8 45 **Instruction**

9  
10 46 Antenatal mental health has become a global public health issue<sup>1</sup>. Depression was the most common  
11 47 mood disorders in the general population, the prevalence ranged from 5% to 10%, which of women was about  
12 48 twice as high as that of men, and childbearing age was the peak of the disease<sup>2</sup>. Depression was one of the  
13 49 most common complications during pregnancy<sup>3</sup>. The meta-analyses of perinatal depression reported the  
14 50 prevalence was 6–13%<sup>4</sup>. The prevalence of antenatal depression was significantly higher than that at any  
15 51 other time, which was about 5-17%<sup>5</sup>. Furthermore, some studies estimated that the prevalence of depression  
16  
17  
18 52 during pregnancy vary from 7-15% in developed countries<sup>6,7</sup>, and 19-25% in less developed countries<sup>6,8</sup>.

19  
20 53 Also, there is a study indicates that the third trimester of pregnancy was a high-incidence period of  
21 54 depression<sup>9</sup>. Depression not only directly affected the physical and mental health of the pregnant women<sup>10</sup>,  
22 55 but also indirectly did harm to the health of the next generation<sup>11</sup>. Depression during pregnancy have been  
23 56 associated with maternal self-harm, suicidal-ideation, placental abruption, preterm delivery, it also might  
24 57 lead to low birth weight, low Apgar score, maladaptive emotional and behavioral development of offsprings<sup>12</sup>  
25 58 <sup>13</sup>. However, most of the studies on maternal depression mainly focused on postnatal depression and there  
26 59 is less data available on antenatal depression.

27  
28  
29 60 Family is an important emotional support sources, family functions play an important role in human life  
30 61 and social development. Family functions refer to the effectiveness of family members' emotional connection,  
31 62 family rules, family communication and coping with external events in the family system<sup>14</sup>. Previous study  
32 63 have showed that good family functions were potential predictors of psychological wellbeing of family  
33 64 members<sup>15</sup>. Similarly, a randomized controlled trial in China intervened with the families of women who had  
34 65 experienced miscarriage, finding that women with a higher level of subjective family-support had a lower  
35 66 incidence of emotional problems<sup>16</sup>. On the contrary, family can also be a source of conflict and stress, we have  
36 67 reason to doubt that family dysfunction is a potential risk factor for antenatal depression in pregnant women.

37  
38  
39 68 Self-efficacy was put forward in 1986 by the famous American psychologist Albert Bandura in his book  
40 69 *Social Foundations of Thought and Action: A Social Cognitive Theory*. Bandura defined it as the conviction that  
41 70 one can successfully execute behaviors required to produce a desired outcome in a specific situation<sup>17</sup>.  
42 71 Bandura et al pointed out that self-efficacy affected or determined people's thinking mode, emotional  
43 72 response mode and then affected people's choice of behavior, this effects might be self-aiding or self-  
44 73 hindering<sup>18</sup>. People's self-efficacy might also affect the depression symptoms they suffer from in threatening  
45 74 situation. A study on the emotional problems of women after abortion showed participants with high self-  
46 75 efficacy exhibited significantly lower levels of depression than that with low self-efficacy<sup>19</sup>. A study suggested  
47 76 that individual well-being and the perception of success were directly dependent on the strength of our  
48 77 respective families of origin<sup>20</sup>. Based on the above theory, this study assumes that self-efficacy is considered  
49 78 a buffer in this predictive relationship between family functions and antenatal depression symptoms.

50  
51  
52  
53  
54 79 In summary, this study aims to explore the prevalence of antenatal depressive symptoms among  
55 80 pregnant women during their third trimester, and completely evaluate the relationship between family  
56 81 functions and the occurrence of antenatal depressive symptoms, as well as the effect of self-efficacy on this  
57 82 potential relationship, in hopes of providing medical personnel with some useful information that can aid  
58 83 early mental interventions on high-risk pregnant women.

1  
2  
3 844 85 **Methods**5 86 **Participants and procedure**

7 87 This cross-sectional study was conducted in urban communities of Hengyang City, Hunan Province, China ,  
8 88 from July to October, 2019. A total of 813 eligible individuals from 14 communities were involved by multi-  
9 89 staged cluster random sampling method. The specific sampling steps are as follows: there were five districts  
10 90 in urban Hengyang, each street was numbered, randomly selected a street from each district (Zhengxiang  
11 91 Street, Qingshan Street, Baishazhou Street, Guangdonglu Street, Zhurong Street). Then, proportional sampling  
12 92 was carried out at a proportion of 1/3, 14 communities were included (four communities in Zhengxiang Street ,  
13 93 three communities in Qingshan Street , three communities Baishazhou Street , two communities in  
14 94 Guangdonglu Street , two communities in Zhurong Street) . All pregnant women who were registered in  
15 95 community health service centers and meeting the inclusion criteria were potential subjects in this  
16 96 study(n=819). The inclusion criteria for the study were as follows: 1. women in the third trimester of  
17 97 pregnancy; 2, pregnant women over 16 years old ;3. pregnant women who had local household registration,  
18 98 or migrant people who lived in urban of Hengyang City for more than 6 months. The exclusion criterion: 1.  
19 99 pregnant women with cognitive disorders, severe mental illnesses or other serious diseases cannot fill out  
20 100 the questionnaire by themselves; 2. pregnant women who refused to participate in the study. Although we  
21 101 strongly encouraged all potential recruiters to participate in our research, there were still six people were  
22 102 excluded, because of refusals to respond and failure to contact. The response rate of questionnaires was 99.3%  
23 103 (813/819).

24 104 Ethics approval was provided by the Ethics Committee of Xiangya School of Public Health, Central South  
25 105 University (XYGW-2019-056). 813 participants were given written information about the purpose of this  
26 106 study and signed a written informed consent. Participants were expected to filled out structured  
27 107 questionnaires by themselves. In addition, the trained research assistants from Xiangya School of Public  
28 108 Health, Central South University would always available to provide assistance and ensure independent  
29 109 responding. Patients or the public were not involved in the design, or conduct, or reporting, or dissemination  
30 110 plans of this research.

31 111  
32 112 **Measures**

33 113 The questionnaire included four sections: demographic characteristics, the revised Chinese version of  
34 114 Family Adaptation Partnership Growth Affection and Resolve Index ( APGAR ) , the General Self-efficacy  
35 115 Scale (GSES) and Patient Health Questionnaire ( PHQ-9 ) . Demographic characteristics included ethnicity  
36 116 (the Han ethnicity, minority), marital status (stable, unstable), occupation (employed, unemployed),  
37 117 education level (senior school and below, college / university degree and above), and so on. In this study,  
38 118 being married was defined as being in a stable marriage. Unstable marriage including unmarried, divorce,  
39 119 widowhood, and so on.

40 120  
41 121 **Assessment tools for family functions**

1  
2  
3  
4 122 Family Adaptation Partnership Growth Affection and Resolve Index ( APGAR ) was originally developed  
5  
6 123 by Smilkstein (1978)<sup>21</sup>, which was a simple self-assessment tool for evaluating the subjective satisfaction of  
7 124 family functions. Five items were used to evaluate five different aspects of family function: family adaptation,  
8 125 family partnership, family growth, family affection and family resolve. Family APGAR index was answered on  
9 126 a 3-point Likert scale from “often” (two points) to “rarely” (zero point). The total score was zero to ten points,  
10 127 good family function has a high family APGAR index between seven and ten, family dysfunction has a  
11 128 moderate family APGAR index between four and six, and severe family dysfunction has a low family APGAR  
12 129 index less than three. Family APGAR index has been widely used and has good reliability and validity<sup>22</sup>. The  
13 130 Cronbach's  $\alpha$  is 0.876.

14 131

### 15 132 **Assessment tools for self-efficacy**

16 133 The General Self-efficacy Scale (GSES) was publicized in 1981 by Ralf Schwarzer<sup>23</sup> and translated into  
17 134 Chinese by Zhang in 1995<sup>24</sup>, which was used to evaluate the self-efficacy level of pregnant women. There are  
18 135 ten items, which were measured using a 4-point Likert scale from “absolutely wrong” (one point) to  
19 136 “absolutely right” (four points). According to the norm of using the GSES, the method of calculating the final  
20 137 self-efficacy score was to divide the total score by ten. The final score ranged from one to four, based on  
21 138 partition criterion for scale, self-efficacy level could be divided into three levels: high (3.1-4), medium (2.1-  
22 139 3), and low (1-2)<sup>25</sup>. The Chinese version of GSES has good reliability and validity which has been validated by  
23 140 et al<sup>24</sup>. The Cronbach'  $\alpha$  of this scale was 0.898.

24 141

### 25 142 **Assessment tools for antenatal depression symptoms**

26 143 Patient Health Questionnaire ( PHQ-9 ) were used to assess the subjective depressive symptoms of  
27 144 pregnant women during the last two weeks. PHQ-9 was revised according to the diagnostic criteria of DSM-  
28 145 IV<sup>26</sup>, which was widely known as simple self-management tools and used in clinical and investigation  
29 146 research<sup>27</sup>. PHQ-9 consisted of nine items, each item described a symptom of depression: 1. loss of pleasure;  
30 147 2. be down in spirits or hopelessness; 3. sleep disorder; 4. lack of energy; 5. diet disorder; 6. self-deprecation;  
31 148 7. trouble concentrating; 8. changes in physical behavior; 9. thoughts of self-harm. Of this scale, subjects rated  
32 149 the frequency of each symptom using a scale of descriptors: not at all, sometimes, more than half the days,  
33 150 nearly every day (scored from zero to three). The total score is 27 points, usually ten points were used as the  
34 151 positive critical value<sup>28</sup>. The Chinese version of the PHQ-9 has been validated by Yu et al<sup>29</sup>. The Cronbach'  $\alpha$   
35 152 of this scale was 0.773.

36 153

### 37 154 **Statistical analysis**

38 155 The method of double input with *EpiData 3.1* was adopted. *SPSS 19.0* software were used for statistical  
39 156 analysis. Quantitative variables were described as the *mean*  $\pm$  *SD*. Categorical variables were expressed as *n*  
40 157 (%). The *T*-test was applied for comparisons of each scale scores of the participants with different  
41 158 demographic characteristics, the variable of  $p < 0.05$  was used as the adjustment variable. Pearson's  
42 159 correlation analysis was conducted to examine the relationships between family functions, self-efficacy level  
43

and antenatal depression symptoms. A structural equation model was established by *AMOS 24.0*. Based on the assumption in this study, family APGAR index as predictors, self-efficacy as mediator, and antenatal depression symptoms as outcome. The total effect (weight *c*) of family functions on antenatal depression symptoms was composed of a direct effect (weight *c'*) of the family functions on the antenatal depression symptoms and an indirect effect (weight *a\*b*) of family functions on antenatal depression symptoms through a proposed mediator. Bootstrapping is a non-parametric resampling method that generates an empirical approximation of the sampling distribution of a statistic from the available data and constructs confidence intervals for the indirect effect<sup>30</sup>. Bootstrap method was used to examine the effect of self-efficacy in explaining the relationship among family functions and antenatal depression symptoms<sup>31</sup>. The confidence interval was set at 95%. Statistical significance level was accepted as  $p < 0.05$ . All statistical tests were 2-sided.

## Result

### Prevalence of depressive symptoms and the distribution of scores in each scale

According to the standard of division, taking ten points as the positive critical value of PHQ-9, 75 (9.2%) participants reported antenatal depressive symptoms within two weeks. The mean family APGAR index was  $7.26 \pm 2.57$ , more than half (60.4%) of the participants reported better family functions, 31.5% ( $n=256$ ) were moderate family dysfunction, 8.1% ( $n=66$ ) participants were severe family dysfunction. The mean self-efficacy score was  $2.55 \pm 0.55$ , 134 (16.5%) and 495 (60.9%) participants reported high and middle level of self-efficacy, respectively. At the same time, more than one fifth of participants reported that they had a low level of self-efficacy ( $n=184$ , 22.6%). (Table 1, Table 2)

**Table 1.** Frequencies and percentages of antenatal depression symptoms, different level of family functions and self-efficacy.

| Variables                      |                                     | N ( % )      |
|--------------------------------|-------------------------------------|--------------|
| Family functions               | Severe family dysfunction ( 0-3 )   | 66 ( 8.1 )   |
|                                | Moderate family dysfunction ( 4-6 ) | 256 ( 31.5 ) |
|                                | Better family functions ( 7-10 )    | 491 ( 60.4 ) |
| Self-efficacy                  | Low level ( 1-2 )                   | 184 ( 22.6 ) |
|                                | Middle level ( 2.1-3 )              | 495 ( 60.9 ) |
|                                | High level ( 3.1-4 )                | 134 ( 16.5 ) |
| Antenatal depression symptomss | Yes ( $\geq 10$ )                   | 75 ( 9.2 )   |
|                                | No                                  | 738 ( 90.8 ) |

**Table 2.** Comparison of each scale scores of the participants with different demographic characteristics.

| Scale     |                   | Family APGAR    | GSES            | PHQ-9           |
|-----------|-------------------|-----------------|-----------------|-----------------|
| Ethnicity | The Han ethnicity | $7.26 \pm 2.56$ | $2.55 \pm 0.55$ | $4.86 \pm 3.47$ |



|                |                                       |           |           |           |
|----------------|---------------------------------------|-----------|-----------|-----------|
|                | Minority                              | 7.20±3.10 | 2.51±0.67 | 5.27±2.74 |
|                | <i>t</i>                              | 0.094     | 0.238     | -0.45     |
| Marital status | Stable                                | 7.37±2.52 | 2.56±0.55 | 4.81±3.36 |
|                | Unstable                              | 6.35±2.79 | 2.40±0.54 | 5.39±4.21 |
|                | <i>t</i>                              | 3.47*     | 2.60*     | -1.47     |
| Occupation     | Employed                              | 7.37±2.61 | 2.59±0.57 | 4.78±3.56 |
|                | Unemployed                            | 6.96±2.44 | 2.43±0.50 | 5.12±3.17 |
|                | <i>t</i>                              | -2.02*    | -3.70*    | 1.25      |
| Education      | Senior school and below               | 6.57±2.63 | 2.44±0.54 | 5.05±3.44 |
|                | College / university degree and above | 7.76±2.40 | 2.62±0.55 | 4.74±3.47 |
|                | <i>t</i>                              | -6.75*    | -4.61*    | 1.26      |

\* $p < 0.05$

### Each scale score of participants with different demographic characteristics

There were 813 participants included in this study, mean age was 28.98±4.52. The participants with stable marital status ( $t=3.47$ ,  $p < 0.05$ ), occupation ( $t=-2.02$ ,  $p < 0.05$ ) and higher level of education ( $t=-6.75$ ,  $p < 0.05$ ) tend to had higher family APGAR index, the participants with stable marital status ( $t=2.60$ ,  $p < 0.05$ ), occupation ( $t=-3.70$ ,  $p < 0.05$ ) and higher level of education ( $t=-4.61$ ,  $p < 0.05$ ) tend to had higher self-efficacy level, the differences were statistically significant. Marital status, occupation, education level will be adjusted in the structural equation model. There was no significant difference in the scores of other demographic variables in the three scales (Table 2).

### Pearson's correlation analysis of self-efficacy, family functions, depressive symptoms

There was a significant correlation between family functions, depressive symptoms and self-efficacy in pregnant women. Pearson's correlation analysis results showed family functions had positive correlation with self-efficacy ( $r = 0.31$ ,  $p < 0.05$ ). Self-efficacy level negatively and significantly associated with antenatal depression symptoms ( $r=-0.23$ ,  $p < 0.05$ ). The negative correlation between family functions and antenatal depression symptoms was statistically significant ( $r=-0.28$ ,  $p < 0.05$ ) (Table 3).

**Table 3.** Means, standard deviations ( *SD* ), and correlations among family functions, self-efficacy, antenatal depression symptoms. ( $n=813$ )

| Variables                       | Mean | <i>SD</i> | 1      | 2      | 3    |
|---------------------------------|------|-----------|--------|--------|------|
| 1.Family functions              | 7.26 | 2.57      | 1.00   | -      | -    |
| 2.Self-efficacy                 | 2.55 | 0.55      | 0.31*  | 1.00   | -    |
| 3.Antenatal depression symptoms | 4.87 | 3.46      | -0.28* | -0.23* | 1.00 |

\* $p < 0.05$

### Mediating effect of self-efficacy level between family functions and depressive symptoms

210 The mediation model showed that the correlation between family functions and self-efficacy level was  
 211 statistically significant( $\beta=0.30$ , 95%CI: 0.24 to 0.37,  $p < 0.00$ ), the correlation between self-efficacy level and  
 212 antenatal depression symptoms was statistically significant ( $\beta=-0.15$ , 95%CI: -0.22 to -0.08,  $p < 0.00$ ), the  
 213 direct effect on the relationship between family functions and antenatal depression symptoms was  
 214 statistically significant( $\beta=-0.24$ , 95%CI: -0.31 to -0.16,  $p < 0.00$ ), the effect of self-efficacy on the relationship  
 215 between family functions and antenatal depression symptoms was statistically significant ( $\beta=-0.05$ , 95%CI: -  
 216 0.07 to -0.03,  $p < 0.00$ ) (**Table 4**). Self-efficacy level partially mediated the relationship between family  
 217 functions and depressive symptoms, and the mediating effect accounted for 17.09% of the total effect. The  
 218 mediation model of the relationship between family functions and antenatal depression symptoms by self-  
 219 efficacy is shown in **Figure 1**.

221 **Table 4.** Mediation role of self-efficacy in the relationship between family functions and antenatal  
 222 depression symptoms ( $n=816$ , Bootstrap=5000)

| Effect          | Paths                                                        | $\beta$ | SE   | BCa 95%CI |       | p    |
|-----------------|--------------------------------------------------------------|---------|------|-----------|-------|------|
|                 |                                                              |         |      | Lower     | Upper |      |
| Direct effects  | Family functions→Self-efficacy                               | 0.30    | 0.03 | 0.24      | 0.37  | 0.00 |
|                 | Family functions→Antenatal depression symptoms               | -0.24   | 0.04 | -0.31     | -0.16 | 0.00 |
|                 | Self-efficacy→Antenatal depression symptoms                  | -0.15   | 0.04 | -0.23     | -0.08 | 0.00 |
| Indirect effect | Family functions→Self-efficacy→Antenatal depression symptoms | -0.05   | 0.01 | -0.07     | -0.03 | 0.00 |

223  $\beta$ , SE and 95%CI were the standardized regression effect value, standard error and 95% confidence interval of the direct and  
 224 indirect effect estimated by the percentile bootstrap method. BCa = Biased-Corrected and Accelerated 5000 bootstrapping;  
 225 adjusted variables: marital status, occupation, education level.

## 227 Discussion

228 In this study, the prevalence of antenatal depression symptoms is 9.2%, which was similar to the findings  
 229 of previous studies<sup>32,33</sup>. Besides, the findings showed that family functions were negatively associated with  
 230 antenatal depression symptoms among women in the third trimester of pregnancy, in line with the study by  
 231 Jin et al in China<sup>34</sup>. A study which carried out in Taiwan, China also reported that pregnant women with  
 232 antenatal depression symptoms tended to have lower family APGAR scores<sup>35</sup>. The Chinese people attach great  
 233 importance to the family clan relations, they regard the family and its members as one of the most important  
 234 sources of social support and spiritual sustenance. Pregnancy is viewed as a stressor, with the increasing of  
 235 sensitivity and vulnerability of women in pregnancy, they are more likely to be influenced by the negative  
 236 external environment and life events, which may lead to depression and other harmful emotional problems.  
 237 Families with well-functioning can help pregnant women coping with stress and crisis, and provide spiritual  
 238 and material help at critical times. However, family dysfunction reflect that pregnant women can't acquire  
 239 enough attention, love and assistance from families, even family may be the source of mental pressure, so that  
 240 depressive symptoms starts or aggravates.

1  
2  
3 241 Furthermore, a significant indirect effect of family functions on antenatal depression symptoms through  
4 242 self-efficacy was found in this study. Self-efficacy varies from person to person, and often changes within the  
5 243 individual over time and in response to specific experiences and environment. First of all, the quality of family  
6 244 functions was closely related to the level of self-efficacy, which is similar to the finding which focus on the  
7 245 relationship between family supports and maternal self-efficacy by Puspasari et al<sup>36</sup>. The possible reason is  
8 246 that a harmonious family atmosphere and positive family functions would contribute to the increasing of the  
9 247 effective handling of stressors, the perceptions of individual self-worth and success<sup>15</sup>. In addition, the level of  
10 248 self-efficacy could predicted the mental activity and attitude in the face of difficulties and stressors, which  
11 249 would lead to different emotional response outcome<sup>37</sup>. People with high self-efficacy are able to control self-  
12 250 abandoned thoughts, tend to handle situations rationally, are willing to accept the challenges of emergency.  
13 251 On the contrary, people with low self-efficacy are prone to faltering, deal with problems emotionally, are  
14 252 helpless in the face of stress, and easily are distracted by fear, panic, and shyness, which are more likely to  
15 253 have depressive symptoms. This may be a pathway for self-efficacy to play an intermediary role in the  
16 254 relationship between stressors and stress outcomes, which in line with the model of Pearlin et al<sup>38</sup>.

17 255 In addition, the mediation effect value is 17.09%, indicates partial mediation. The finding reflected that  
18 256 there were other mediators in the relationship between family functions and antenatal depression symptoms.  
19 257 Some other potential mediators have been proposed in previous studies among pregnant women. A study by  
20 258 Waqas et al in Pakistan showed that social support was a mediator of the relationship of total number of  
21 259 children, gender of children and antenatal depression<sup>39</sup>. Relational resilience as a potential mediator between  
22 260 adverse childhood experiences and prenatal depression was found by Howell et al<sup>40</sup>. However, the mediating  
23 261 effect of these variables has not been demonstrated in the relationship between family functions and  
24 262 antenatal depressive symptoms, which is worth exploring in future studies.

25 263 The samples of this study were selected from pregnant women enrolled in community health service  
26 264 centers, with low no response rate. Compared with the study with hospital samples, the samples were more  
27 265 representative of the real situation of ordinary pregnant women. Women in the third trimester of pregnancy  
28 266 were selected to evaluate their antenatal depression symptoms for nearly two weeks, with less recall bias.  
29 267 There are some limitations in this study. First, it was a cross-sectional study, for which a causal relationship  
30 268 could not be inferred. Second, it cannot be denied that the results of this study may be influenced by some  
31 269 confounding factors that have not been considered. Third, because of the self-filled questionnaire, there was  
32 270 an inevitable reporting bias in this study. Future studies should investigate the causal relationships among  
33 271 family functions, self-efficacy and antenatal depression symptoms with longitudinal designs.

34 272

### 35 273 **Conclusion**

36 274 In summary, the prevalence of antenatal depression symptoms is 9.2% among women in the third  
37 275 trimester of pregnancy. Last but not least, this study also contributes to the literature by exploring self-  
38 276 efficacy as a mediator to explain the relationship between family functions and antenatal depression  
39 277 symptoms. Based on this finding, we can take measures to aid early mental interventions on high-risk  
40 278 pregnant women, and then reduce the pain and financial burden of the depression on the pregnant women  
41 279 and the family.

42 280

### 43 281 **Author affiliations**

44 282 1. Department of Social Medicine and Health Management, Xiangya School of Public Health, Central South  
45 283 University, Changsha, China.

46 284

1  
2  
3 285 **Acknowledgements**

4 286 We are grateful to all teachers and students who generously shared their time and experience for this  
5 287 study. What's more, we acknowledge the women who kindly gave consent to participate in the research and  
6 288 the staff who cooperated with us in the investigation on the communities.  
7  
8 289

9  
10 290 **Competing interests** None.  
11 291

12 292 **Funding** This research received no specific grant from any funding agency in the public, commercial or not-  
13 293 for-profit sectors.  
14 294

15  
16 295 **Contributors** Conceptualization, XD Zhu and BH Zheng; Methodology, BH Zheng and WS Zhou;  
17 296 Investigation, BH Zheng, Z Hu, WS Zhou, YH Yu and SL Yin.; Resources, XD Zhu; Data Curation, BH Zheng and  
18 297 YH Yu; Writing – Original Draft Preparation, BH Zheng; Writing – Review & Editing, HL Xu.  
19 298

20  
21 299 **Patient consent** Obtained.  
22 300

23  
24 301 **Ethics approval** Study protocol was approved by the Ethics Committee of Xiangya School of Public Health,  
25 302 Central South University (XYGW-2019-056).  
26 303 .

27  
28 304 **Provenance and peer review** Not commissioned; externally peer reviewed.  
29 305

30 306 **Data sharing statement** No additional data are available.  
31 307

32  
33 308 **References**

- 34  
35 309 1. Adams SS, Eberhard-Gran M, Eskild A. Fear of childbirth and duration of labour: a study of  
36  
37 310 2206 women with intended vaginal delivery. *British Journal of Obstetrics and*  
38  
39 311 *Gynaecology* 2012;119(10):1238-46.  
40  
41  
42  
43 312 2. Weissman M, Olfson M. Depression in women: implications for health care research. *Science*  
44  
45 313 1995;269(5225):799-801.  
46  
47  
48 314 3. O'Hara MW, Wisner KL. Perinatal mental illness: Definition, description and aetiology *Best*  
49  
50 315 *Practice & Research Clinical Obstetrics & Gynaecology* 2014;28(1):3-12.  
51  
52  
53 316 4. Gavin NI, Gaynes BN, Lohr KN, et al. Perinatal Depression: A Systematic Review of  
54  
55 317 Prevalence and Incidence. *Obstetrics and Gynecology* 2005;106:1071-83.  
56  
57  
58 318 5. Bennett HA, Einarson A, Taddio A, et al. Prevalence of Depression During Pregnancy:  
59  
60

- 1  
2  
3  
4 319 Systematic Review. *Obstetrics & Gynecology* 2004;103(4):698-709.  
5  
6  
7 320 6. Rahman A, Iqbal Z, Harrington R. Life events, social support and depression in childbirth:  
8  
9 321 perspectives from a rural community in the developing world. *Psychol Med*  
10  
11 322 2003;33(7):1161-67.  
12  
13  
14 323 7. Evans J, Heron J, Francomb H, et al. Cohort study of depressed mood during pregnancy  
15  
16 324 and after childbirth. *BMJ* 2001;323:257-60.  
17  
18  
19 325 8. Cohen LS, Altshuler LL, Harlow BL, et al. Relapse of Major Depression During Pregnancy in  
20  
21 326 Women Who Maintain or Discontinue Antidepressant Treatment. *JAMA*  
22  
23 327 2006;295(5):499-504.  
24  
25  
26  
27 328 9. Lin PC, Hung CH. Mental health trajectories and related factors among perinatal women. *J*  
28  
29 329 *Clin Nurs* 2015;24(11-12):1585-93.  
30  
31  
32 330 10. Zayas LH, Cunningham M, Mckee MD, et al. Depression and negative life events among  
33  
34 331 pregnant African-American and Hispanic women. *Women's Health Issues*  
35  
36 332 2002;12(1):16-22.  
37  
38  
39  
40 333 11. Kingston D, Tough S, Whitfield H, et al. Prenatal and Postpartum Maternal Psychological  
41  
42 334 Distress and Infant Development: A Systematic Review. *Child Psychiatry and Human*  
43  
44 335 *Development* 2012;45(5):683-714.  
45  
46  
47  
48 336 12. Chen CH, Lin HC. Prenatal Care and Adverse Pregnancy Outcomes Among Women With  
49  
50 337 Depression: A Nationwide Population-based Study. *Canadian Journal of Psychiatry*  
51  
52 338 *Revue Canadienne de Psychiatrie* 2011;56(5):273-80.  
53  
54  
55  
56 339 13. Ross J, Hanlon C, Medhin G, et al. Perinatal mental distress and infant morbidity in Ethiopia:  
57  
58 340 a cohort study. *Archives of Disease in Childhood - Fetal and Neonatal Edition*  
59  
60

- 1  
2  
3  
4 341 2011;96(1):F59-F64.  
5  
6 342 14. Beavers R, Hampson RB. The Beavers Systems Model of Family Functioning. *Journal of*  
7  
8  
9 343 *Family Therapy* 2002;22(2):128-43.  
10  
11 344 15. Garcíacadena CH, Rubia JMDL, Díazdiaz HL, et al. EFFECT OF FAMILY STRENGTH  
12  
13  
14 345 OVER THE PSYCHOLOGICAL WELL-BEING AND INTERNAL LOCUS OF  
15  
16  
17 346 CONTROL. *Journal of Behavior Health & Social Issues* 2013;5(2):33-46.  
18  
19 347 16. Sun S, Li J, Ma Y, et al. Effects of a family-support programme for pregnant women with  
20  
21  
22 348 foetal abnormalities requiring pregnancy termination: A randomized controlled trial in  
23  
24  
25 349 China. *International Journal of Nursing Practice* 2017:e12614-22.  
26  
27 350 17. Bandura A. Self-Efficacy Mechanism in Human Agency. *Am Psychol* 1982;37(2):122-47.  
28  
29 351 18. Bandura A, Wood R. Effect of Perceived Controllability and Performance Standards on Self-  
30  
31  
32 352 Regulation of Complex Decision Making. *Journal of Personality & Social Psychology*  
33  
34  
35 353 1989;56(5):805-14.  
36  
37 354 19. Faure S, Loxton H. Anxiety, Depression and Self-Efficacy Levels of Women Undergoing  
38  
39  
40 355 First Trimester Abortion. *South African Journal of Psychology* 2003;33(1):28-38.  
41  
42  
43 356 20. Lippold MA, Jensen TM. Harnessing the strength of families to prevent social problems and  
44  
45  
46 357 promote adolescent well-being. *Children and Youth Services Review* 2017;79:432-41.  
47  
48 358 21. Smilkstein G. The family APGAR: a proposal for a family function test and its use by  
49  
50  
51 359 physicians. *Journal of Family Practice* 1978;6(6):1231-39.  
52  
53 360 22. Smilkstein G, Ashworth C, Dan M. Validity and reliability of the family APGAR as a test of  
54  
55  
56 361 family function. *J Fam Pract* 1982;15(2):303-11.  
57  
58 362 23. Schwarzer R, Aristi B. Optimistic self-beliefs: Assessment of general perceived self-efficacy  
59  
60

- 1  
2  
3  
4 363 in thirteen cultures. *World Psychology* 1997;3(2):177-90.  
5  
6  
7 364 24. Zhang JX, Schwarzer R. Measuring optimistic self-beliefs: A Chinese adaptation of the  
8  
9 365 General Self-Efficacy Scale. *Psychologia* 1995;38(3):174-81.  
10  
11  
12 366 25. Cheung SK, Sun SY. Assessment of optimistic self-beliefs: further validation of the Chinese  
13  
14 367 version of the General Self-Efficacy Scale. *Psychological Reports* 1999;85(1224):1221.  
15  
16  
17 368 26. Spitzer RL, Kroenke K, Williams JB. Validation and utility of a self-report version of PRIME-  
18  
19 369 MD : The PHQ Primary Care Study. *J Am Med Assoc* 1999;282:7.  
20  
21  
22 370 27. Guo B, Kaylorhughes C, Garland A, et al. Factor structure and longitudinal measurement  
23  
24 371 invariance of PHQ-9 for specialist mental health care patients with persistent major  
25  
26 372 depressive disorder: Exploratory Structural Equation Modelling. *J Affect Disord*  
27  
28 373 2017;219:1-8.  
29  
30  
31  
32 374 28. Kroenke K, Spitzer RL, Williams JBW. The PHQ-9 : Validity of a Brief Depression Severity  
33  
34 375 Measure. *Journal of General Internal Medicine* 2001;16(9):606-13.  
35  
36  
37 376 29. Yu X, Tam WW, Wong PT, et al. The Patient Health Questionnaire-9 for measuring  
38  
39 377 depressive symptoms among the general population in Hong Kong. *Comprehensive*  
40  
41 378 *Psychiatry* 2012;53(1):95-102.  
42  
43  
44  
45 379 30. Roelofs J, Huibers M, Peeters F, et al. Effects of neuroticism on depression and anxiety:  
46  
47 380 Rumination as a possible mediator. *Personality and Individual Differences*  
48  
49 381 2008;44(3):576-86. doi: 10.1016/j.paid.2007.09.019  
50  
51  
52  
53 382 31. Preacher KJ, Hayes AF. Asymptotic and resampling strategies for assessing and comparing  
54  
55 383 indirect effects in multiple mediator models. *Behav Res Methods* 2008;40(3):879-91.  
56  
57 384 doi: 10.3758/brm.40.3.879 [published Online First: 2008/08/14]  
58  
59  
60

- 1  
2  
3  
4 385 32. Zhou JJ, Pan WG, Zhou J, et al. Depressive and anxiety symptoms during stages of  
5  
6 386 perinatal period and influencing factors. *Journal of Neuroscience and Mental Health*  
7  
8  
9 387 2019;19:235-39.  
10  
11 388 33. Byatt N, Xiao RS, Dinh KH, et al. Mental health care use in relation to depressive symptoms  
12  
13 389 among pregnant women in the USA. *Archives of Women's Mental Health*  
14  
15 390 2016;19:187-91.  
16  
17 391 34. Jin XY, Yu Y, Ai DQ. The study of the status of the family care and the anxiety of the second  
18  
19 392 child pregnant woman. *Journal of general nursing* 2019;17:109-10.  
20  
21 393 35. Tsai SY. Relationship of perceived job strain and workplace support to antenatal depressive  
22  
23 394 symptoms among pregnant employees in Taiwan. *Women & Health* 2018;59(2):1-26.  
24  
25 395 36. Puspasari J, Nur Rachmawati I, Budiati T. Family support and maternal self-efficacy of  
26  
27 396 adolescent mothers. *Enfermería Clínica* 2018;28:227-31.  
28  
29 397 37. Folkman S, Lazarus RS. Stress process and depressive symptomology. *Journal of*  
30  
31 398 *Abnormal Psychology* 1986;95(2):107-13.  
32  
33 399 38. Pearlin LI, Mccall ME. Occupational Stress and Marital Support 1990.  
34  
35 400 39. Waqas A, Raza N, Lodhi HW, et al. Psychosocial Factors of Antenatal Anxiety and  
36  
37 401 Depression in Pakistan: Is Social Support a Mediator? *Plos One* 2015;10:1-14.  
38  
39 402 40. Howell KH, Miller-Graff LE, Schaefer LM, et al. Relational resilience as a potential mediator  
40  
41 403 between adverse childhood experiences and prenatal depression. *Journal of Health*  
42  
43 404 *Psychology* 2017:1-13.  
44  
45 405  
46  
47  
48  
49  
50  
51  
52  
53  
54  
55  
56  
57  
58  
59  
60



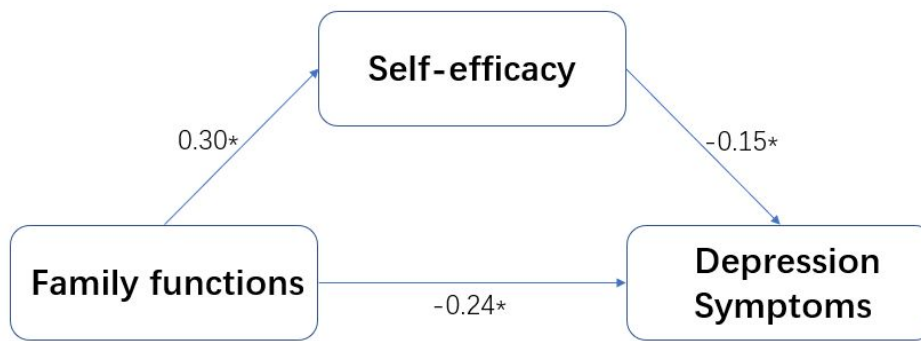

**Figure 1.** Structural equation model testing self-efficacy as a mediator in the relationship between family functions and depressive symptoms. (a) The model has been adjusted for marital status, occupation, education level. The above values have been standardized. (b) \* $p < 0.05$

知情同意书

由于优生优育的盛行，孕产妇的身心健康问题日益受人关注。妊娠期伴有焦虑抑郁等情绪异常容易引起多种围产期并发症，不利于母亲、胎儿及新生儿的健康。因此，我们将建立健康档案以了解妊娠期孕妇的心理状态，分析其相关影响因素，有针对性地缓解孕妇的负面情绪，做好孕妇的心理咨询和保健工作服务，减轻妊娠期孕妇负面情绪，提高生活质量。

您为我们提供的相关信息将作为孕妇在妊娠的随访下保持身心健康，顺利度过妊娠期，且为医护人员、精神卫生工作者提供科学依据。参与并完成该调查会耽误您宝贵的时间。

您是否参加此调查或是否在调查过程中中途退出，完全是您的自由，您不会因为拒绝参加或者退出调查而受到惩罚或歧视，如果有些问题令您感到不安，您可以拒绝回答；任何时侯都可以终止访谈，这不会影响您所接受的医疗服务质量。

我们会对您的个人资料、隐私等严格保密。读完这份知情同意后，如果您愿意参加本次调查，请在下面签名。您的签名代表您已经了解本次研究的相关事项，同意参加本次研究，同意研究者得到您的相关信息。希望您如实填写问卷，提供真实的信息，非常感谢您的帮助！

参与者签名：

签名日期： 年 月 日

989x632mm (72 x 72 DPI)

**STROBE 2007 (v4) Statement—Checklist of items that should be included in reports of *cross-sectional studies***

| Section/Topic                | Item # | Recommendation                                                                                                                                                                       | Reported on page # |
|------------------------------|--------|--------------------------------------------------------------------------------------------------------------------------------------------------------------------------------------|--------------------|
| <b>Title and abstract</b>    | 1      | (a) Indicate the study's design with a commonly used term in the title or the abstract                                                                                               | P1                 |
|                              |        | (b) Provide in the abstract an informative and balanced summary of what was done and what was found                                                                                  | P1                 |
| <b>Introduction</b>          |        |                                                                                                                                                                                      | <b>P2</b>          |
| Background/rationale         | 2      | Explain the scientific background and rationale for the investigation being reported                                                                                                 | P2                 |
| Objectives                   | 3      | State specific objectives, including any prespecified hypotheses                                                                                                                     | P2                 |
| <b>Methods</b>               |        |                                                                                                                                                                                      | <b>P2</b>          |
| Study design                 | 4      | Present key elements of study design early in the paper                                                                                                                              | P3                 |
| Setting                      | 5      | Describe the setting, locations, and relevant dates, including periods of recruitment, exposure, follow-up, and data collection                                                      | P3                 |
| Participants                 | 6      | (a) Give the eligibility criteria, and the sources and methods of selection of participants                                                                                          | P3                 |
| Variables                    | 7      | Clearly define all outcomes, exposures, predictors, potential confounders, and effect modifiers. Give diagnostic criteria, if applicable                                             | P3                 |
| Data sources/<br>measurement | 8*     | For each variable of interest, give sources of data and details of methods of assessment (measurement). Describe comparability of assessment methods if there is more than one group | P3-4               |
| Bias                         | 9      | Describe any efforts to address potential sources of bias                                                                                                                            | P3                 |
| Study size                   | 10     | Explain how the study size was arrived at                                                                                                                                            | P3                 |
| Quantitative variables       | 11     | Explain how quantitative variables were handled in the analyses. If applicable, describe which groupings were chosen and why                                                         | P3                 |
| Statistical methods          | 12     | (a) Describe all statistical methods, including those used to control for confounding                                                                                                | P4                 |
|                              |        | (b) Describe any methods used to examine subgroups and interactions                                                                                                                  | P3                 |
|                              |        | (c) Explain how missing data were addressed                                                                                                                                          | P3                 |
|                              |        | (d) If applicable, describe analytical methods taking account of sampling strategy                                                                                                   | P3                 |
|                              |        | (e) Describe any sensitivity analyses                                                                                                                                                | No                 |
| <b>Results</b>               |        |                                                                                                                                                                                      | P4                 |

|                          |     |                                                                                                                                                                                                              |      |
|--------------------------|-----|--------------------------------------------------------------------------------------------------------------------------------------------------------------------------------------------------------------|------|
| Participants             | 13* | (a) Report numbers of individuals at each stage of study—eg numbers potentially eligible, examined for eligibility, confirmed eligible, included in the study, completing follow-up, and analysed            | P3-4 |
|                          |     | (b) Give reasons for non-participation at each stage                                                                                                                                                         | P3   |
|                          |     | (c) Consider use of a flow diagram                                                                                                                                                                           | No   |
| Descriptive data         | 14* | (a) Give characteristics of study participants (eg demographic, clinical, social) and information on exposures and potential confounders                                                                     | P4-5 |
|                          |     | (b) Indicate number of participants with missing data for each variable of interest                                                                                                                          | No   |
| Outcome data             | 15* | Report numbers of outcome events or summary measures                                                                                                                                                         | P5   |
| Main results             | 16  | (a) Give unadjusted estimates and, if applicable, confounder-adjusted estimates and their precision (eg, 95% confidence interval). Make clear which confounders were adjusted for and why they were included | P4-6 |
|                          |     | (b) Report category boundaries when continuous variables were categorized                                                                                                                                    | P5   |
|                          |     | (c) If relevant, consider translating estimates of relative risk into absolute risk for a meaningful time period                                                                                             | P5-6 |
| Other analyses           | 17  | Report other analyses done—eg analyses of subgroups and interactions, and sensitivity analyses                                                                                                               | P5-6 |
| <b>Discussion</b>        |     |                                                                                                                                                                                                              | P6   |
| Key results              | 18  | Summarise key results with reference to study objectives                                                                                                                                                     | P6-7 |
| Limitations              | 19  | Discuss limitations of the study, taking into account sources of potential bias or imprecision. Discuss both direction and magnitude of any potential bias                                                   | P7   |
| Interpretation           | 20  | Give a cautious overall interpretation of results considering objectives, limitations, multiplicity of analyses, results from similar studies, and other relevant evidence                                   | P7   |
| Generalisability         | 21  | Discuss the generalisability (external validity) of the study results                                                                                                                                        | P7   |
| <b>Other information</b> |     |                                                                                                                                                                                                              | P8   |
| Funding                  | 22  | Give the source of funding and the role of the funders for the present study and, if applicable, for the original study on which the present article is based                                                | P8   |

\*Give information separately for cases and controls in case-control studies and, if applicable, for exposed and unexposed groups in cohort and cross-sectional studies.

**Note:** An Explanation and Elaboration article discusses each checklist item and gives methodological background and published examples of transparent reporting. The STROBE checklist is best used in conjunction with this article (freely available on the Web sites of PLoS Medicine at <http://www.plosmedicine.org/>, Annals of Internal Medicine at <http://www.annals.org/>, and Epidemiology at <http://www.epidem.com/>). Information on the STROBE Initiative is available at [www.strobe-statement.org](http://www.strobe-statement.org).

# BMJ Open

## The association between family functions and antenatal depression symptoms : a cross-sectional study among pregnant women in urban communities of Hengyang City, China

|                                 |                                                                                                                                                                                                                                                                                                                                                                                                                                                                                                                                                                                                                                                                                                                                                                                    |
|---------------------------------|------------------------------------------------------------------------------------------------------------------------------------------------------------------------------------------------------------------------------------------------------------------------------------------------------------------------------------------------------------------------------------------------------------------------------------------------------------------------------------------------------------------------------------------------------------------------------------------------------------------------------------------------------------------------------------------------------------------------------------------------------------------------------------|
| Journal:                        | <i>BMJ Open</i>                                                                                                                                                                                                                                                                                                                                                                                                                                                                                                                                                                                                                                                                                                                                                                    |
| Manuscript ID                   | bmjopen-2019-036557.R1                                                                                                                                                                                                                                                                                                                                                                                                                                                                                                                                                                                                                                                                                                                                                             |
| Article Type:                   | Original research                                                                                                                                                                                                                                                                                                                                                                                                                                                                                                                                                                                                                                                                                                                                                                  |
| Date Submitted by the Author:   | 20-May-2020                                                                                                                                                                                                                                                                                                                                                                                                                                                                                                                                                                                                                                                                                                                                                                        |
| Complete List of Authors:       | Zheng, Baohua; Central South University Xiangya School of Public Health, Department of Social Medicine and Health Management<br>Yu, Yunhan; Central South University Xiangya School of Public Health, Department of Social Medicine and Health Management<br>Zhu, Xidi; Central South University Xiangya School of Public Health, Department of Social Medicine and Health Management<br>Hu, Zhao; Central South University Xiangya School of Public Health, Zhou, Wensu; Central South University, Social Medicine and Health Management, Xiangya School of Public Health;<br>Yin, Shilin; Central South University Xiangya School of Public Health<br>Xu, Huilan; Central South University Xiangya School of Public Health, Department of Social Medicine and Health Management, |
| <b>Primary Subject Heading</b>: | Public health                                                                                                                                                                                                                                                                                                                                                                                                                                                                                                                                                                                                                                                                                                                                                                      |
| Secondary Subject Heading:      | Public health, Mental health                                                                                                                                                                                                                                                                                                                                                                                                                                                                                                                                                                                                                                                                                                                                                       |
| Keywords:                       | OBSTETRICS, Depression & mood disorders < PSYCHIATRY, SOCIAL MEDICINE                                                                                                                                                                                                                                                                                                                                                                                                                                                                                                                                                                                                                                                                                                              |
|                                 |                                                                                                                                                                                                                                                                                                                                                                                                                                                                                                                                                                                                                                                                                                                                                                                    |

SCHOLARONE™  
Manuscripts



I, the Submitting Author has the right to grant and does grant on behalf of all authors of the Work (as defined in the below author licence), an exclusive licence and/or a non-exclusive licence for contributions from authors who are: i) UK Crown employees; ii) where BMJ has agreed a CC-BY licence shall apply, and/or iii) in accordance with the terms applicable for US Federal Government officers or employees acting as part of their official duties; on a worldwide, perpetual, irrevocable, royalty-free basis to BMJ Publishing Group Ltd ("BMJ") its licensees and where the relevant Journal is co-owned by BMJ to the co-owners of the Journal, to publish the Work in this journal and any other BMJ products and to exploit all rights, as set out in our [licence](#).

The Submitting Author accepts and understands that any supply made under these terms is made by BMJ to the Submitting Author unless you are acting as an employee on behalf of your employer or a postgraduate student of an affiliated institution which is paying any applicable article publishing charge ("APC") for Open Access articles. Where the Submitting Author wishes to make the Work available on an Open Access basis (and intends to pay the relevant APC), the terms of reuse of such Open Access shall be governed by a Creative Commons licence – details of these licences and which [Creative Commons](#) licence will apply to this Work are set out in our licence referred to above.

Other than as permitted in any relevant BMJ Author's Self Archiving Policies, I confirm this Work has not been accepted for publication elsewhere, is not being considered for publication elsewhere and does not duplicate material already published. I confirm all authors consent to publication of this Work and authorise the granting of this licence.

1  
2  
3  
4 1 **The association between family functions and antenatal depression symptoms : a**  
5  
6 2 **cross-sectional study among pregnant women in urban communities of Hengyang**  
7 3 **City, China**  
8  
9 4  
10 5

11 6 Baohua Zheng<sup>1</sup>, Yunhan Yu<sup>1</sup>, Xidi Zhu<sup>1</sup>, Zhao Hu<sup>1</sup>, Wensu Zhou<sup>1</sup>, Shilin Yin<sup>1</sup>, Huilan Xu<sup>1,\*</sup>  
12 7

13  
14 8 <sup>1</sup> Department of Social Medicine and Health Management, Xiangya School of Public Health, Central South  
15 9 University, Changsha, China.

16 10 \*Correspondence to

17 11 Dr Huilan Xu;

18 12 [xhlxuhuilan@163.com](mailto:xhlxuhuilan@163.com)  
19 13

20 14 **Abstract**

21 15 **Objective:** To explore the prevalence of depressive symptoms among women in late pregnancy, and assess  
22 16 mediating effect of self-efficacy in the association between family functions and the antenatal depressive  
23 17 symptoms.

24 18 **Design:** Community-based, cross-sectional study was conducted among women during the third trimester of  
25 19 pregnancy.

26 20 **Setting:** This study was conducted among pregnant women registered at community health service centers  
27 21 of urban Hengyang City, China from July to October, 2019.

28 22 **Participants:** 813 people were selected from 14 communities by multi-staged cluster random sampling  
29 23 method.

30 24 **Main outcome measures:** The Family Adaptation Partnership Growth Affection and Resolve Index  
31 25 ( APGAR ) , the General Self-efficacy Scale (GSES) and Patient Health Questionnaire ( PHQ-9 ) were used to  
32 26 access family functions, self-efficacy and antenatal depression symptoms, respectively.

33 27 **Results:** In this study, 9.2% pregnant women reported the symptoms of antenatal depression (95CI%: 7.2%  
34 28 to 11.2%). After adjustment, the results showed that severe family dysfunction (AOR: 3.67; 95% CI: 1.88 to  
35 29 7.14) and low level of self-efficacy (AOR: 3.16; 95% CI: 1.37 to 7.27) were associated with antenatal  
36 30 depressive symptoms( $p < 0.05$ ). Furthermore, self-efficacy level partially mediated the association between

37  
38 31 family functions and antenatal depressive symptoms( $\beta=-0.05$ , 95%CI: -0.07 to -0.03,  $p < 0.05$ ), and the  
39 32 mediating effect accounted for 17.09% of the total effect.

40 33 **Conclusions:** This study reported 9.2% positive rates of antenatal depression symptoms among women in  
41 34 the third trimester of pregnancy in Hengyang City, China. The mediating effect of self-efficacy on the  
42 35 association between family functions and antenatal depression symptoms among women in the third  
43 36 trimester of pregnancy was found in this study, which provide a theoretical basis to maternal and child health  
44 37 personnel to identify high-risk pregnant women and take targeted intervention for them.

45 38 **Keywords :** antenatal depression symptoms ; self-efficacy ; family functions ; China

46 39 **Strengths and limitations of this study**  
47 40  
48 41  
49 42  
50 43  
51 44  
52 45  
53 46  
54 47  
55 48  
56 49  
57 50  
58 51  
59 52  
60 53

- 1  
2  
3 40 ● This study aimed to assess the prevalence of antenatal depressive symptoms among women in the third  
4 41 trimester of pregnancy, and completely evaluate the effect of self-efficacy correction between family  
5 42 functions and the antenatal depressive symptoms. This study provides evidence and support for  
6 43 identifying high-risk pregnant women with emotional problems in order to take early intervention  
7 44 measures.  
8  
9 45 ● In this study, the selection of sample is representative, pregnant women were enrolled from community  
10 46 health service centers, with low no-response rate and recall bias.  
11  
12 47 ● The cross-sectional study limited the ability to make causal inferences. Future studies should investigate  
13 48 the causal relationships among family functions, self-efficacy and antenatal depression symptoms with  
14 49 longitudinal designs.

15  
16 50 **Word count: 3296**

17 51 **Instruction**

18  
19 52 Depression was the most common mood disorders in the general population, the prevalence ranged  
20 53 from 5% to 10%, which of women was about twice as high as that of men, and childbearing age was the peak  
21 54 of the disease<sup>1</sup>. Furthermore, depression was one of the most common complications during pregnancy<sup>2</sup>. The  
22 55 meta-analyses of perinatal depression reported the prevalence was 6% to 13%<sup>3</sup>. The prevalence of antenatal  
23 56 depression was significantly higher than any other time<sup>4</sup>, especially in the third trimester of pregnancy<sup>5</sup>. Also  
24 57 note that, the prevalence of depression in less developed countries is higher than that in developed countries,  
25  
26 58 vary from 19% to 25% during pregnancy<sup>6-8</sup>. Depression not only directly affected the physical and mental  
27  
28 59 health of the pregnant women<sup>9</sup>, but also indirectly did harm to the health of the next generation<sup>10</sup>. During  
29 60 pregnancy, depression symptoms have been associated with self-harm, suicidal-ideation, placental abruption,  
30 61 preterm delivery, they also might lead to low birth weight, low Apgar score, maladaptive emotional and  
31 62 behavioral development of offsprings<sup>11,12</sup>. From what has been discussed above, antenatal depression has  
32 63 become a global public health issue<sup>13</sup>, particular attention needs to be paid to antenatal depression among  
33 64 women in late pregnancy in developing countries. However, many studies on maternal depression mainly  
34 65 focused on postnatal depression and there is less data available on antenatal depression in China.

35  
36 66 Family is an important emotional support sources, family functions play an important role in human life  
37 67 and social development. For pregnant women, family functions refer to the effectiveness of family members'  
38 68 emotional connection, family rules, family communication and coping with external events in the family  
39 69 system during pregnancy<sup>14</sup>, including family adaptation, family partnership, family growth, family affection,  
40 70 family resolve. Generally speaking, in well-functioning families, pregnant women can get support and  
41 71 guidance from other members when they encounter difficulties and crises, and obtain material and emotional  
42 72 satisfaction. On the contrary, family can also be a source of conflict and stress, a study proposed family  
43 73 members' expectations on the newborn were usually manifested through excessive attention and care to  
44 74 pregnant women, which might increase negative effects and stress to the pregnant women<sup>15</sup>. It is not clear  
45 75 whether there is a factor that influences the association between family functions and antenatal depression  
46 76 symptoms, leading two these two different effects. Self-efficacy is one of the possible factors of this  
47 77 contradictory result. A study suggested self-efficacy was negatively correlated with depression, anxiety and  
48 78 other adverse emotional problems<sup>16</sup>. For pregnant women, self-efficacy can be expressed as the conviction  
49 79 that women can successfully execute behaviors required to produce a desired outcome during pregnancy<sup>17</sup>.  
50 80 Self-efficacy may affect or determine pregnant women's thinking mode, emotional response mode and the  
51 81 choice of behavior, which might be self-aiding or self-hindering<sup>18</sup>. The mediating effect of self-efficacy in the  
52 82 association between family functions and depressive symptoms has not been proven during pregnancy. Based



1  
2  
3 83 on the above theory, this study aims to explore the prevalence of antenatal depressive symptoms among  
4 84 pregnant women during their third trimester, and completely assess the association between family functions,  
5 85 self-efficacy and antenatal depressive symptoms, in hopes of providing medical personnel with some useful  
6 86 information that can aid early mental interventions on high-risk pregnant women.  
7  
8  
9 87

## 10 88 **Methods**

### 11 89 **Participants and procedure**

12  
13 90 This cross-sectional study was conducted in urban communities of Hengyang City, Hunan Province, China ,  
14  
15 91 from July to October, 2019. A total of 813 eligible individuals from 14 communities were involved by multi-  
16 92 staged cluster random sampling method. The specific sampling steps are as follows: there were five districts  
17 93 in urban Hengyang, each street was numbered, randomly selected a street from each district. Then,  
18 94 proportional sampling was carried out at a proportion of 1/3, 14 communities were included. The sample  
19 95 size calculation formula for cross-sectional studies was used to calculate the minimum theoretical sample size  
20 96 for this study. According to the prevalence of antenatal depression symptoms, which have been reported in a  
21 97 previous study<sup>19</sup>,  $d=0.1$ ,  $\alpha=0.05$ . Finally, 812 people were required in order for the participants to represent  
22 98 the population. All pregnant women who were registered in community health service centers and meeting  
23 99 the inclusion criteria were potential subjects in this study( $n=819$ ). The inclusion criteria for the study were  
24 100 as follows: 1. women in the third trimester of pregnancy; 2, pregnant women over 16 years old ;3. pregnant  
25 101 women who had local household registration, or migrant people who lived in urban of Hengyang City for more  
26 102 than 6 months. The exclusion criterion: 1. pregnant women with cognitive disorders, severe mental illnesses  
27 103 or other serious diseases cannot fill out the questionnaire by themselves; 2. pregnant women who refused to  
28 104 participate in the study. Through the information provided by the community maternal management system,  
29 105 we contacted each potential recruiter and made an appointment for the interview time. Accompanied by the  
30 106 community maternal and child health personnel, trained investigators handed out questionnaires by calling  
31 107 at the house and collected them on the spot. 813 participants were given written information about the  
32 108 purpose of this study and signed a written informed consent. Participants were expected to filled out  
33 109 structured questionnaires by themselves. In addition, the trained research assistants from Xiangya School of  
34 110 Public Health, Central South University would always available to provide assistance and ensure independent  
35 111 responding. Although we strongly encouraged all potential recruiters to participate in our research, there  
36 112 were still six people were excluded, because of refusals to respond and failure to contact. The response rate  
37 113 of questionnaires was 99.3% (813/819). Ethics approval was provided by the Ethics Committee of Xiangya  
38 114 School of Public Health, Central South University (XYGW-2019-056).  
39  
40  
41  
42  
43  
44  
45  
46  
47  
48  
49  
50  
51  
52  
53  
54  
55  
56  
57  
58  
59  
60

### 116 **Patient and public involvement**

117 We did not involve patients or the public in our work. Each participant received a report describing the  
118 results of our study.

### 120 **Measures**

121 The questionnaire included four sections: demographic characteristics, the revised Chinese version of  
122 Family Adaptation Partnership Growth Affection and Resolve Index ( APGAR ) , the General Self-efficacy  
123 Scale (GSES) and Patient Health Questionnaire ( PHQ-9 ) . Demographic characteristics included marital

1  
2  
3 124 status (stable, unstable), occupation (employed, unemployed), education level (senior school and below,  
4 125 college / university degree and above). In this study, being married was defined as being in a stable marriage.  
5  
6 126 Unstable marriage including unmarried, divorce, widowhood.  
7  
8 127

### 9 128 **Assessment tools for family functions**

10 129 Family Adaptation Partnership Growth Affection and Resolve Index ( APGAR ) was originally developed  
11  
12 130 by Smilkstein (1978)<sup>20</sup>, which was a simple self-assessment tool for evaluating the subjective satisfaction of  
13  
14 131 family functions. Five items were used to evaluate five different aspects of family function: family adaptation,  
15  
16 132 family partnership, family growth, family affection and family resolve. Family APGAR index was answered on  
17  
18 133 a 3-point Likert scale from “often” (two points) to “rarely” (zero point). The total score was zero to ten points,  
19  
20 134 good family function has a high family APGAR index between seven and ten, family dysfunction has a  
21  
22 135 moderate family APGAR index between four and six, and severe family dysfunction has a low family APGAR  
23  
24 136 index less than three. Family APGAR index has been widely used and has good reliability and validity<sup>21</sup>. In this  
25  
26 137 study, the Cronbach's  $\alpha$  is 0.876.  
27  
28 138

### 29 139 **Assessment tools for self-efficacy**

30 140 The General Self-efficacy Scale (GSES) was publicized in 1981 by Ralf Schwarzer and translated into  
31  
32 141 Chinese by Zhang in 1995<sup>22,23</sup>, which was used to evaluate the self-efficacy level of pregnant women. There  
33  
34 142 are ten items, which were measured using a 4-point Likert scale from “absolutely wrong” (one point) to  
35  
36 143 “absolutely right” (four points). According to the norm of using the GSES, the method of calculating the final  
37  
38 144 self-efficacy score was to divide the total score by ten. The final score ranged from one to four, based on  
39  
40 145 partition criterion for scale, self-efficacy level could be divided into three levels: high (3.1-4), medium (2.1-  
41  
42 146 3), and low (1-2)<sup>24</sup>. The Chinese version of GSES has good reliability and validity which has been validated by  
43  
44 147 et al<sup>23</sup>. The Cronbach'  $\alpha$  of this scale was 0.898 in this study.  
45  
46 148

### 47 149 **Assessment tools for antenatal depression symptoms**

48 150 Patient Health Questionnaire ( PHQ-9 ) were used to assess the subjective depressive symptoms of  
49  
50 151 pregnant women during the last two weeks in this study. PHQ-9 was revised according to the diagnostic  
51  
52 152 criteria of DSM-IV<sup>25</sup>, which was widely known as simple self-management tools and used in clinical and  
53  
54 153 investigation research<sup>26</sup>. PHQ-9 consisted of nine items, each item described a symptom of depression: 1. loss  
55  
56 154 of pleasure; 2. be down in spirits or hopelessness; 3. sleep disorder; 4. lack of energy; 5. diet disorder; 6. self-  
57  
58 155 deprecation; 7. trouble concentrating; 8. changes in physical behavior; 9. thoughts of self-harm. Of this scale,  
59  
60 156 subjects rated the frequency of each symptom using a scale of descriptors: not at all, sometimes, more than  
157  
158 157 half the days, nearly every day (scored from zero to three). The total score is 27 points, usually ten points  
159  
160 158 were used as the positive critical value<sup>27</sup>. The Chinese version of the PHQ-9 has been validated by Yu et  
161  
162 159 al<sup>28</sup>. The Cronbach'  $\alpha$  of this scale was 0.773 in the study.  
160  
161 160

### 162 161 **Statistical analysis**

163 162 The method of double input with *EpiData 3.1* was adopted. *SPSS 19.0* software were used for statistical

analysis. Categorical variables are expressed as  $n$  (%), the  $\chi^2$  test was applied for comparing the different characteristics between participants in two groups (depressive symptoms vs no depressive symptoms). The crude odds ratio (COR), adjusted odds ratio (AOR) and 95% confidence interval (95% CI) were reported by multivariate binary logistic regression models. The adjusted variables including marital status, occupation and education. A structural equation model was established by *AMOS 24.0*. Based on the assumption in this study, family APGAR index as predictors, self-efficacy as mediator, and antenatal depression symptoms as outcome. The total effect (weight  $c$ ) of family functions on antenatal depression symptoms was composed of a direct effect (weight  $c'$ ) of the family functions on the antenatal depression symptoms and an indirect effect (weight  $a*b$ ) of family functions on antenatal depression symptoms through a proposed mediator. Bootstrapping is a non-parametric resampling method that generates an empirical approximation of the sampling distribution of a statistic from the available data and constructs confidence intervals for the indirect effect<sup>29</sup>. Bootstrap method was used to examine the effect of self-efficacy in explaining the relationship among family functions and antenatal depression symptoms<sup>30</sup>. The confidence interval was set at 95%. Statistical significance level was accepted as  $p < 0.05$ . All statistical tests were 2-sided.

## Result

### Characteristics of participants and the prevalence of antenatal depressive symptoms

In the study, the majority of participants were in a stable marriage (89.5%) and were employed (73.7%). More than half of them have college/university degree and above (58.1%). 60.4% of them have better family functions, 31.5% and 8.1% have moderate and severe family dysfunction, respectively. 60.9% of them have medium levels of self-efficacy, 22.6% and 16.5% have low and high level, respectively (**Table1**). According to the standard of division, taking ten points as the positive critical value of PHQ-9, 75 (9.2%) participants reported antenatal depressive symptoms within two weeks (95CI%: 7.2% to 11.2%).

### The results of Chi-square tests and multivariate binary logistic regression analysis

According to the results of Chi-square tests shown in **Table 1**, the differences in family functions and self-efficacy between the two groups were statistically significant ( $p < 0.05$ ). Besides, the results of multivariate binary logistic regression showed that severe family dysfunction (AOR: 3.67; 95% CI: 1.88 to 7.14) and low level of self-efficacy (AOR: 3.16; 95% CI: 1.37 to 7.27) were the risk factors for antenatal depressive symptoms, after adjusted for occupation, marital status and education. (**Table2**)

**Table 1.** The characteristics of the two groups of participants were compared (depressive symptoms vs no depressive symptoms).

| Variables      | Depressive symptoms<br>( n=75 ) | No depressive symptoms<br>( n=738 ) | Total<br>( n=813 ) | $\chi^2$ value | $p$ value |
|----------------|---------------------------------|-------------------------------------|--------------------|----------------|-----------|
| Marital status |                                 |                                     |                    | 0.21           | 0.65      |
| Stable         | 66(88.0)                        | 662(89.7)                           | 728(89.5)          |                |           |
| Unstable       | 9 (12.0)                        | 76 (10.3)                           | 85(10.5)           |                |           |
| Occupation     |                                 |                                     |                    | 0.04           | 0.84      |
| Employed       | 56(74.7)                        | 543(73.6)                           | 599(73.7)          |                |           |

|                                       |          |           |           |       |      |
|---------------------------------------|----------|-----------|-----------|-------|------|
| Unemployed                            | 19(25.3) | 195(26.4) | 214(26.3) |       |      |
| Education                             |          |           |           | 0.39  | 0.53 |
| Senior school and below               | 34(45.3) | 307(41.6) | 341(41.9) |       |      |
| College / university degree and above | 41(54.7) | 431(58.4) | 472(58.1) |       |      |
| Family functions                      |          |           |           | 23.77 | 0.00 |
| Severe family dysfunction ( 0-3 )     | 17(22.7) | 49 (6.6)  | 66 (8.1)  |       |      |
| Moderate family dysfunction ( 4-6 )   | 22(29.3) | 234(31.7) | 256(31.5) |       |      |
| Better family functions ( 7-10 )      | 36(48.0) | 455(61.7) | 491(60.4) |       |      |
| Self-efficacy                         |          |           |           | 21.65 | 0.00 |
| Low level ( 1-2 )                     | 33(44.0) | 151(20.5) | 184(22.6) |       |      |
| Middle level ( 2.1-3 )                | 34(45.3) | 461(62.5) | 495(60.9) |       |      |
| High level ( 3.1-4 )                  | 8 (10.7) | 126(17.1) | 134(16.5) |       |      |

196 Data are presented as n (%).

197

198

199

200 **Table 2**

201 Multivariate binary logistic regression analysis of family functions and self-efficacy associated with antenatal depression symptoms.

| Variables                   | COR* (95% CI)          | AOR** (95% CI)         |
|-----------------------------|------------------------|------------------------|
| Family functions            |                        |                        |
| Severe family dysfunction   | <b>3.67(1.88,7.14)</b> | <b>3.67(1.88,7.14)</b> |
| Moderate family dysfunction | 0.99(0.56,1.74)        | 0.99(0.56,1.74)        |
| Better family functions     | <b>1.00</b>            | <b>1.00</b>            |
| Self-efficacy               |                        |                        |
| Low level                   | <b>3.16(1.37,7.27)</b> | <b>3.16(1.37,7.27)</b> |
| Middle level                | 1.14(0.51,2.55)        | 1.14(0.51,2.55)        |
| High level                  | <b>1.00</b>            | <b>1.00</b>            |

202 Abbreviations: COR, crude odds ratio; AOR, adjusted odds ratio.

203 \* Multivariate binary logistic regression model.

204 \*\*Some general characteristics were adjusted (marital status, occupation and education).

205 Characters in bold indicate statistical significance,  $p < 0.05$ .

206

### 207 **Mediating effect of self-efficacy level between family functions and depressive symptoms**

208 There was a significant correlation between family functions, antenatal depressive symptoms and self-  
209 efficacy in pregnant women. In indirect effects, family functions showed a positive correlation with self-

210 efficacy( $\beta=0.30$ , 95%CI: 0.24 to 0.37,  $p < 0.05$ ), and self-efficacy showed a negative correlation with antenatal

211 depression symptoms( $\beta=-0.15$ , 95%CI: -0.22 to -0.08,  $p < 0.05$ ). In direct effect, family functions showed a

212 negative correlation with antenatal depression symptoms(  $\beta=-0.24$ , 95%CI: -0.31 to -0.16,  $p < 0.05$ )(**Table 3**).

213 Self-efficacy level partially mediated the association between family functions and depressive symptoms,

214 and the mediating effect accounted for 17.09% of the total effect. The mediation model of the association  
215 between family functions and antenatal depression symptoms by self-efficacy is shown in **Figure 1**.

216

217 **Table 3.** Mediation role of self-efficacy in the association between family functions and antenatal depression  
218 symptoms ( $n=813$ , Bootstrap=5000)

| Paths                                                        | $\beta$ | SE   | BCa 95%CI |       | p    |
|--------------------------------------------------------------|---------|------|-----------|-------|------|
|                                                              |         |      | Lower     | Upper |      |
| <b>Direct effects</b>                                        |         |      |           |       |      |
| Family functions→Self-efficacy                               | 0.30    | 0.03 | 0.24      | 0.37  | 0.00 |
| Family functions→Antenatal depression symptoms               | -0.24   | 0.04 | -0.31     | -0.16 | 0.00 |
| Self-efficacy→Antenatal depression symptoms                  | -0.15   | 0.04 | -0.23     | -0.08 | 0.00 |
| <b>Indirect effect</b>                                       |         |      |           |       |      |
| Family functions→Self-efficacy→Antenatal depression symptoms | -0.05   | 0.01 | -0.07     | -0.03 | 0.00 |

219  $\beta$ , SE and 95%CI were the standardized regression effect value, standard error and 95% confidence interval of the direct and  
220 indirect effect estimated by the percentile bootstrap method. BCa = Biased-Corrected and Accelerated 5000 bootstrapping;  
221 adjusted variables: marital status, occupation, education level.

222

## 223 Discussion

224 In this study, the prevalence of antenatal depression symptoms is 9.2%(95CI%: 7.2% to 11.2%), which  
225 was similar to the findings of previous studies<sup>31,32</sup>. Besides, the findings showed that the risk of depression  
226 symptoms in participants who had family dysfunction was 3.67 times as much as that in the reference  
227 group(better functions group), family functions were directly and negatively associated with antenatal  
228 depression symptoms among women in the third trimester of pregnancy, the finding was in line with the  
229 study by Jin et al. in China<sup>33</sup>. A study which carried out in Taiwan, China also reported that pregnant women  
230 with antenatal depression symptoms tended to have lower family APGAR scores<sup>34</sup>. Probably because Chinese  
231 people attach great importance to the family clan relations, they regard the family and its members as one of  
232 the most important sources of social support and spiritual sustenance. Pregnancy is viewed as a stressor, with  
233 the increasing of sensitivity and vulnerability of women in pregnancy, they are more likely to be influenced  
234 by the negative external environment and life events, which may lead to depression and other harmful  
235 emotional problems. In a well-functioning family, family members can detect the physical and psychological  
236 changes of women during pregnancy, and provide timely and effective spiritual and material help when  
237 pregnant women cope with stressor and crisis, so as to enhance their sense of family belonging, identity<sup>35</sup>.  
238 However, family dysfunction reflects that pregnant women can't acquire enough attention, love, identity and  
239 assistance from families, even family may be the source of mental pressure, so that depressive symptoms  
240 starts or aggravates. In this study, no significant association was found between high level of family functions  
241 and depressive symptoms among women in their third trimester of pregnancy.

242 Furthermore, this study found that self-efficacy had a significant mediating effect on the association  
243 between family functions and antenatal depression symptoms, which was also recognized by Faure et al<sup>36</sup>.  
244 Self-efficacy varies from person to person, and often changes within the individual over time and in response  
245 to specific experiences and environment. The level of self-efficacy could predict the mental activity and  
246 attitude in the face of difficulties and stressors, which would lead to different emotional response outcome<sup>37</sup>.  
247 People with high self-efficacy are able to control self-abandoned thoughts, tend to handle situations rationally,  
248 are willing to accept the challenges of emergency. In other words, when a pregnant woman receives

1  
2  
3 249 insufficient support, everyday life care, spiritual comfort and sympathy from her families, good self-efficacy  
4 250 can alleviate her negative emotions and depressive symptoms. On the contrary, people with low self-efficacy  
5 251 are prone to faltering, deal with problems emotionally, are helpless in the face of stress, and easily are  
6 252 distracted by fear, panic, and shyness, which are more likely to have depressive symptoms. Even in a family  
7 253 with good family functions, pregnant women with low self-efficacy could not make full use of family support  
8 254 and turn it into the motivation to improve their negative emotions<sup>38</sup>. This may be a pathway for self-efficacy  
9 255 to play an intermediary role in the association between stressors and stress outcomes, which also in line with  
10 256 the model of Pearlin et al<sup>39</sup>. In addition, the mediation effect value is 17.09%, indicated partial mediation. The  
11 257 finding reflected that there were other mediators in the association between family functions and antenatal  
12 258 depression symptoms. Some other potential mediators have been proposed in previous studies among  
13 259 pregnant women. A study by Waqas et al. in Pakistan showed that social support was mediated the association  
14 260 between total number of children, gender of children and antenatal depression<sup>40</sup>. As a potential mediator,  
15 261 relational resilience affected the association between adverse childhood experiences and prenatal  
16 262 depression<sup>41</sup>. However, the mediating effect of these variables has not been demonstrated in the relationship  
17 263 between family functions and antenatal depressive symptoms, which is worth exploring in future study.

18 264 The samples of this study were selected from pregnant women who were enrolled from community health  
19 265 service centers, with low no-response rate. Compared with the study with hospital samples, the samples were  
20 266 more representative of the truth of ordinary pregnant women. Women in the third trimester of pregnancy  
21 267 were selected to evaluate their antenatal depression symptoms for nearly two weeks, with less recall bias.  
22 268 There are some limitations in this study. First, this study was a cross-sectional study, although this study  
23 269 proved the association between family functions, self-efficacy and antenatal depression symptoms based on  
24 270 the established structural equation model, the validity of the theory still needs to be further followed up or  
25 271 tested through intervention experiments. Second, in this study self-filled questionnaires were used, there was  
26 272 an inevitable reporting bias in this study, which might lead to the underestimation of positive reporting rate  
27 273 of depressive symptoms.

#### 274 **Conclusion**

275 In summary, in this study the prevalence of antenatal depression symptoms is 9.2% among women in  
276 the third trimester of pregnancy. In this study, the findings suggested that pregnant women's self-efficacy  
277 mediated the association between family functions and antenatal depression symptoms. On the one hand,  
278 family functions can negatively predict antenatal depression symptoms; on the other hand, self-efficacy can  
279 indirectly and negatively predict antenatal depression symptoms. Based on this finding, maternal and child  
280 health personnel can provide some early mental interventions to high-risk pregnant women, including family  
281 counseling courses for pregnant women's families to improving family functions and peer education courses  
282 for pregnant women to increase their sense of self-identity and self-worth according to the actual needs.  
283 Reducing the pain and economic burdens of depression both by pregnant women themselves and their  
284 families.

#### 285 **Author affiliations**

286 1. Department of Social Medicine and Health Management, Xiangya School of Public Health, Central South  
287 University, Changsha, China.

#### 289 **Acknowledgements**

290 We are grateful to all teachers and students who generously shared their time and experience for this  
291 study. What's more, we acknowledge the women who kindly gave consent to participate in the research and  
292 the staff who cooperated with us in the investigation on the communities.

1  
2  
3 293

4 294 **Competing interests** None.

5  
6 295

7 296 **Funding** This research received no specific grant from any funding agency in the public, commercial or not-  
8 297 for-profit sectors.

9  
10 298

11 299 **Contributors** Conceptualization, BZ,ZH; Methodology, BZ, WZ, ZH; Investigation, BZ, ZH, WZ, YY, SY, XZ;  
12 300 Resources, XZ; Data Curation, BZ, YY, WZ; Writing – Original Draft Preparation, BZ; Writing – Review & Editing,  
13 301 HX,ZH. We also acknowledge the pregnant women who participated in this research.

14 302

15 303 **Patient consent** Obtained.

16 304

17 305 **Ethics approval** Study protocol was approved by the Ethics Committee of Xiangya School of Public Health,  
18 306 Central South University (XYGW-2019-056).

19 307

20 308 **Provenance and peer review** Not commissioned; externally peer reviewed.

21 309

22 310 **Data sharing statement** No additional data are available.

23 311

24 312 **References**

25 313 1. Weissman M, Olfson M. Depression in women: implications for health care research. *Science*

26 314 1995;269(5225):799-801.

27 315 2. O'Hara MW, Wisner KL. Perinatal mental illness: Definition, description and aetiology *Best*

28 316 *Practice & Research Clinical Obstetrics & Gynaecology* 2014;28(1):3-12.

29 317 3. Gavin NI, Gaynes BN, Lohr KN, et al. Perinatal Depression: A Systematic Review of

30 318 Prevalence and Incidence. *Obstetrics and Gynecology* 2005;106:1071-83.

31 319 4. Bennett HA, Einarson A, Taddio A, et al. Prevalence of Depression During Pregnancy:

32 320 Systematic Review. *Obstetrics & Gynecology* 2004;103(4):698-709.

33 321 5. Lin PC, Hung CH. Mental health trajectories and related factors among perinatal women. *J*

34 322 *Clin Nurs* 2015;24(11-12):1585-93.

35 323 6. Rahman A, Iqbal Z, Harrington R. Life events, social support and depression in childbirth:

36 324 perspectives from a rural community in the developing world. *Psychol Med*

- 1  
2  
3  
4 325 2003;33(7):1161-67.  
5  
6  
7 326 7. Evans J, Heron J, Francomb H, et al. Cohort study of depressed mood during pregnancy  
8  
9 327 and after childbirth. *BMJ* 2001;323:257-60.  
10  
11  
12 328 8. Cohen LS, Altshuler LL, Harlow BL, et al. Relapse of Major Depression During Pregnancy in  
13  
14 329 Women Who Maintain or Discontinue Antidepressant Treatment. *JAMA*  
15  
16  
17 330 2006;295(5):499-504.  
18  
19  
20 331 9. Zayas LH, Cunningham M, Mckee MD, et al. Depression and negative life events among  
21  
22 332 pregnant African-American and Hispanic women. *Women's Health Issues*  
23  
24  
25 333 2002;12(1):16-22.  
26  
27  
28 334 10. Kingston D, Tough S, Whitfield H, et al. Prenatal and Postpartum Maternal Psychological  
29  
30 335 Distress and Infant Development: A Systematic Review. *Child Psychiatry and Human*  
31  
32 336 *Development* 2012;45(5):683-714.  
33  
34  
35 337 11. Chen CH, Lin HC. Prenatal Care and Adverse Pregnancy Outcomes Among Women With  
36  
37  
38 338 Depression: A Nationwide Population-based Study. *Canadian Journal of Psychiatry*  
39  
40 339 *Revue Canadienne de Psychiatrie* 2011;56(5):273-80.  
41  
42  
43 340 12. Ross J, Hanlon C, Medhin G, et al. Perinatal mental distress and infant morbidity in Ethiopia:  
44  
45  
46 341 a cohort study. *Archives of Disease in Childhood - Fetal and Neonatal Edition*  
47  
48  
49 342 2011;96(1):59-64.  
50  
51  
52 343 13. Adams SS, Eberhard-Gran M, Eskild A. Fear of childbirth and duration of labour: a study of  
53  
54 344 2206 women with intended vaginal delivery. *British Journal of Obstetrics and*  
55  
56 345 *Gynaecology* 2012;119(10):1238-46.  
57  
58  
59 346 14. Beavers R, Hampson RB. The Beavers Systems Model of Family Functioning. *Journal of*  
60



- 1  
2  
3  
4 347 *Family Therapy* 2002;22(2):128-43.
- 5  
6 348 15. Ma CM, Chen JY, Wang MX. Analysis of the anxiety status and influencing factors of  
7  
8  
9 349 pregnant women with second pregnancy in late pregnancy. *Journal of Nursing*  
10  
11 350 *Administration* 2017;17(12):872-75.
- 12  
13  
14 351 16. Lightsey OR, Burke M, Ervin A. Generalized self-efficacy, self-esteem, and negative affect.  
15  
16  
17 352 *Canadian Journal of Behavioural Science* 2006;38(1):72-80.
- 18  
19 353 17. Bandura A. Self-Efficacy Mechanism in Human Agency. *Am Psychol* 1982;37(2):122-47.
- 20  
21  
22 354 18. Bandura A, Wood R. Effect of Perceived Controllability and Performance Standards on Self-  
23  
24 355 Regulation of Complex Decision Making. *Journal of Personality & Social Psychology*  
25  
26 356 1989;56(5):805-14.
- 27  
28  
29 357 19. Ayano G, Tesfaw G, Shumet S. Prevalence and determinants of antenatal depression in  
30  
31 358 Ethiopia: A systematic review and meta-analysis. *Plos One* 2019;14(2):1-17.
- 32  
33  
34 359 20. Smilkstein G. The family APGAR: a proposal for a family function test and its use by  
35  
36 360 physicians. *Journal of Family Practice* 1978;6(6):1231-39.
- 37  
38  
39 361 21. Smilkstein G, Ashworth C, Dan M. Validity and reliability of the family APGAR as a test of  
40  
41 362 family function. *J Fam Pract* 1982;15(2):303-11.
- 42  
43  
44 363 22. Schwarzer R, Aristi B. Optimistic self-beliefs: Assessment of general perceived self-efficacy  
45  
46 364 in thirteen cultures. *World Psychology* 1997;3(2):177-90.
- 47  
48  
49 365 23. Zhang JX, Schwarzer R. Measuring optimistic self-beliefs: A Chinese adaptation of the  
50  
51 366 General Self-Efficacy Scale. *Psychologia* 1995;38(3):174-81.
- 52  
53  
54 367 24. Cheung SK, Sun SY. Assessment of optimistic self-beliefs: further validation of the Chinese  
55  
56 368 version of the General Self-Efficacy Scale. *Psychological Reports* 1999;85(3):1221-24.
- 57  
58  
59  
60

- 1  
2  
3  
4 369 25. Spitzer RL, Kroenke K, Williams JB. Validation and utility of a self-report version of PRIME-  
5  
6 370 MD : The PHQ Primary Care Study. *J Am Med Assoc* 1999;282(18):1737-44.  
7  
8  
9 371 26. Guo B, Kaylorhughes C, Garland A, et al. Factor structure and longitudinal measurement  
10  
11 372 invariance of PHQ-9 for specialist mental health care patients with persistent major  
12  
13 373 depressive disorder: Exploratory Structural Equation Modelling. *J Affect Disord*  
14  
15 374 2017;219:1-8.  
16  
17 375 27. Kroenke K, Spitzer RL, Williams JBW. The PHQ-9 : Validity of a Brief Depression Severity  
18  
19 376 Measure. *Journal of General Internal Medicine* 2001;16(9):606-13.  
20  
21 377 28. Yu X, Tam WW, Wong PT, et al. The Patient Health Questionnaire-9 for measuring  
22  
23 378 depressive symptoms among the general population in Hong Kong. *Comprehensive*  
24  
25 379 *Psychiatry* 2012;53(1):95-102.  
26  
27 380 29. Roelofs J, Huibers M, Peeters F, et al. Effects of neuroticism on depression and anxiety:  
28  
29 381 Rumination as a possible mediator. *Personality and Individual Differences*  
30  
31 382 2008;44(3):576-86.  
32  
33 383 30. Preacher KJ, Hayes AF. Asymptotic and resampling strategies for assessing and comparing  
34  
35 384 indirect effects in multiple mediator models. *Behav Res Methods* 2008;40(3):879-91.  
36  
37 385 31. Zhou JJ, Pan WG, Zhou J, et al. Depressive and anxiety symptoms during stages of  
38  
39 386 perinatal period and influencing factors. *Journal of Neuroscience and Mental Health*  
40  
41 387 2019;19:235-39.  
42  
43 388 32. Byatt N, Xiao RS, Dinh KH, et al. Mental health care use in relation to depressive symptoms  
44  
45 389 among pregnant women in the USA. *Archives of Women's Mental Health*  
46  
47 390 2016;19:187-91.  
48  
49  
50  
51  
52  
53  
54  
55  
56  
57  
58  
59  
60

- 1  
2  
3  
4 391 33. Jin XY, Yu Y, Ai DQ. The study of the status of the family care and the anxiety of the second  
5  
6 392 child pregnant woman. *Journal of general nursing* 2019;17:109-10.  
7  
8  
9 393 34. Tsai SY. Relationship of perceived job strain and workplace support to antenatal depressive  
10  
11 394 symptoms among pregnant employees in Taiwan. *Women & Health* 2018;59(2):1-26.  
12  
13  
14 395 35. Sun S, Li J, Ma Y, et al. Effects of a family-support programme for pregnant women with  
15  
16 396 foetal abnormalities requiring pregnancy termination: A randomized controlled trial in  
17  
18 397 China. *International Journal of Nursing Practice* 2017:1-9.  
19  
20  
21  
22 398 36. Faure S, Loxton H. Anxiety, Depression and Self-Efficacy Levels of Women Undergoing  
23  
24 399 First Trimester Abortion. *South African Journal of Psychology* 2003;33(1):28-38.  
25  
26  
27 400 37. Folkman S, Lazarus RS. Stress process and depressive symptomology. *Journal of*  
28  
29 401 *Abnormal Psychology* 1986;95(2):107-13.  
30  
31  
32 402 38. Maddux JE, Meier LJ. Self-Efficacy and Depression. *Self-Efficacy, Adaptation, and*  
33  
34 403 *Adjustment* 1995:143-69.  
35  
36  
37 404 39. Pearlin LI, Mccall ME. Occupational Stress and Marital Support: Springer US 1990:39-61.  
38  
39  
40 405 40. Waqas A, Raza N, Lodhi HW, et al. Psychosocial Factors of Antenatal Anxiety and  
41  
42 406 Depression in Pakistan: Is Social Support a Mediator? *Plos One* 2015;10:1-14.  
43  
44  
45 407 41. Howell KH, Miller-Graff LE, Schaefer LM, et al. Relational resilience as a potential mediator  
46  
47 408 between adverse childhood experiences and prenatal depression. *Journal of Health*  
48  
49 409 *Psychology* 2017:1-13.  
50  
51  
52  
53 410  
54  
55  
56 411  
57  
58 412  
59  
60

1  
2  
3  
4  
5  
6  
7  
8  
9  
10  
11  
12  
13  
14  
15  
16  
17  
18  
19  
20  
21  
22  
23  
24  
25  
26  
27  
28  
29  
30  
31  
32  
33  
34  
35  
36  
37  
38  
39  
40  
41  
42  
43  
44  
45  
46  
47  
48  
49  
50  
51  
52  
53  
54  
55  
56  
57  
58  
59  
60

413

414 **Figure 1.** Structural equation model testing self-efficacy as a mediator in the association between family functions and depressive  
415 symptoms. (a) The model has been adjusted for marital status, occupation, education level. The above values have been  
416 standardized. (b) \* $p < 0.05$

For peer review only

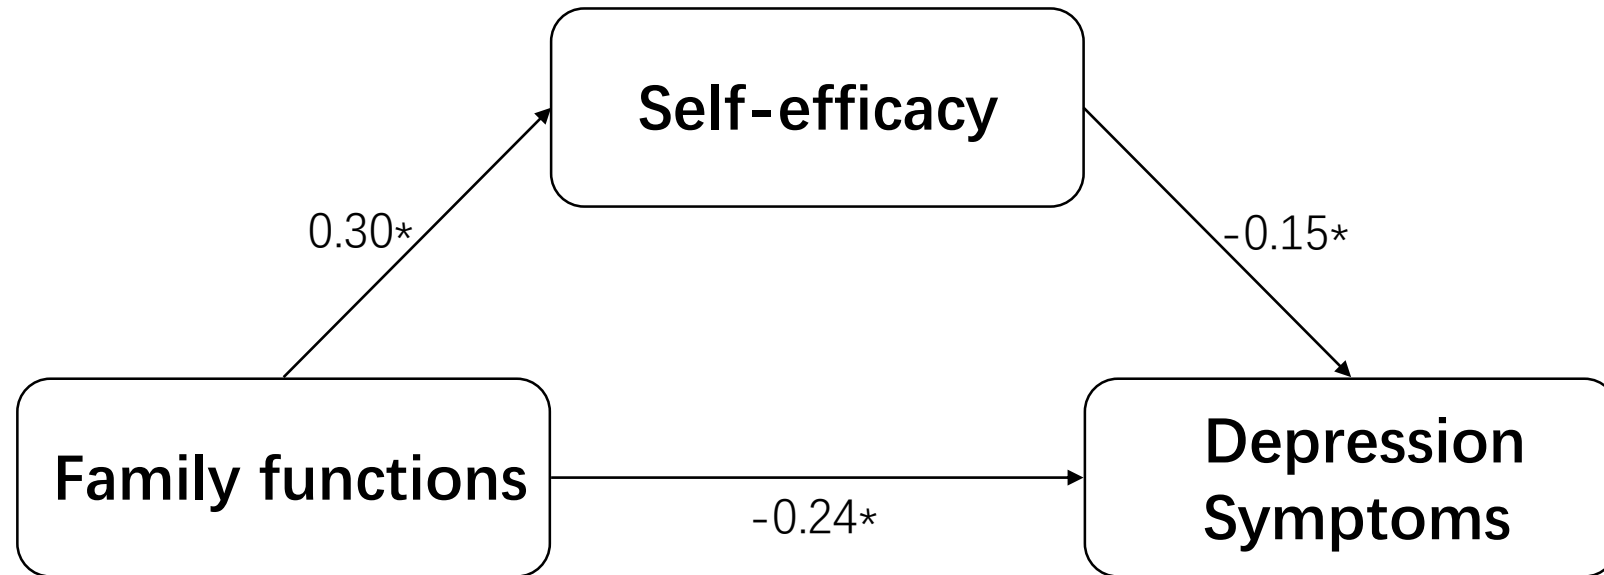

**STROBE 2007 (v4) Statement—Checklist of items that should be included in reports of *cross-sectional studies***

| Section/Topic                | Item # | Recommendation                                                                                                                                                                       | Reported on page # |
|------------------------------|--------|--------------------------------------------------------------------------------------------------------------------------------------------------------------------------------------|--------------------|
| <b>Title and abstract</b>    | 1      | (a) Indicate the study's design with a commonly used term in the title or the abstract                                                                                               | P1                 |
|                              |        | (b) Provide in the abstract an informative and balanced summary of what was done and what was found                                                                                  | P1                 |
| <b>Introduction</b>          |        |                                                                                                                                                                                      | <b>P2</b>          |
| Background/rationale         | 2      | Explain the scientific background and rationale for the investigation being reported                                                                                                 | P2                 |
| Objectives                   | 3      | State specific objectives, including any prespecified hypotheses                                                                                                                     | P2                 |
| <b>Methods</b>               |        |                                                                                                                                                                                      | <b>P2</b>          |
| Study design                 | 4      | Present key elements of study design early in the paper                                                                                                                              | P3                 |
| Setting                      | 5      | Describe the setting, locations, and relevant dates, including periods of recruitment, exposure, follow-up, and data collection                                                      | P3                 |
| Participants                 | 6      | (a) Give the eligibility criteria, and the sources and methods of selection of participants                                                                                          | P3                 |
| Variables                    | 7      | Clearly define all outcomes, exposures, predictors, potential confounders, and effect modifiers. Give diagnostic criteria, if applicable                                             | P3                 |
| Data sources/<br>measurement | 8*     | For each variable of interest, give sources of data and details of methods of assessment (measurement). Describe comparability of assessment methods if there is more than one group | P3-4               |
| Bias                         | 9      | Describe any efforts to address potential sources of bias                                                                                                                            | P3                 |
| Study size                   | 10     | Explain how the study size was arrived at                                                                                                                                            | P3                 |
| Quantitative variables       | 11     | Explain how quantitative variables were handled in the analyses. If applicable, describe which groupings were chosen and why                                                         | P4                 |
| Statistical methods          | 12     | (a) Describe all statistical methods, including those used to control for confounding                                                                                                | P4                 |
|                              |        | (b) Describe any methods used to examine subgroups and interactions                                                                                                                  | P4                 |
|                              |        | (c) Explain how missing data were addressed                                                                                                                                          | P4                 |
|                              |        | (d) If applicable, describe analytical methods taking account of sampling strategy                                                                                                   | P4                 |
|                              |        | (e) Describe any sensitivity analyses                                                                                                                                                | No                 |
| <b>Results</b>               |        |                                                                                                                                                                                      | P5                 |

|                          |     |                                                                                                                                                                                                              |      |
|--------------------------|-----|--------------------------------------------------------------------------------------------------------------------------------------------------------------------------------------------------------------|------|
| Participants             | 13* | (a) Report numbers of individuals at each stage of study—eg numbers potentially eligible, examined for eligibility, confirmed eligible, included in the study, completing follow-up, and analysed            | P5   |
|                          |     | (b) Give reasons for non-participation at each stage                                                                                                                                                         | P3   |
|                          |     | (c) Consider use of a flow diagram                                                                                                                                                                           | No   |
| Descriptive data         | 14* | (a) Give characteristics of study participants (eg demographic, clinical, social) and information on exposures and potential confounders                                                                     | P4-5 |
|                          |     | (b) Indicate number of participants with missing data for each variable of interest                                                                                                                          | No   |
| Outcome data             | 15* | Report numbers of outcome events or summary measures                                                                                                                                                         | P5   |
| Main results             | 16  | (a) Give unadjusted estimates and, if applicable, confounder-adjusted estimates and their precision (eg, 95% confidence interval). Make clear which confounders were adjusted for and why they were included | P5   |
|                          |     | (b) Report category boundaries when continuous variables were categorized                                                                                                                                    | P5   |
|                          |     | (c) If relevant, consider translating estimates of relative risk into absolute risk for a meaningful time period                                                                                             | P6   |
| Other analyses           | 17  | Report other analyses done—eg analyses of subgroups and interactions, and sensitivity analyses                                                                                                               | P6   |
| <b>Discussion</b>        |     |                                                                                                                                                                                                              | P6   |
| Key results              | 18  | Summarise key results with reference to study objectives                                                                                                                                                     | P6-7 |
| Limitations              | 19  | Discuss limitations of the study, taking into account sources of potential bias or imprecision. Discuss both direction and magnitude of any potential bias                                                   | P7   |
| Interpretation           | 20  | Give a cautious overall interpretation of results considering objectives, limitations, multiplicity of analyses, results from similar studies, and other relevant evidence                                   | P7   |
| Generalisability         | 21  | Discuss the generalisability (external validity) of the study results                                                                                                                                        | P7   |
| <b>Other information</b> |     |                                                                                                                                                                                                              | P8   |
| Funding                  | 22  | Give the source of funding and the role of the funders for the present study and, if applicable, for the original study on which the present article is based                                                | P8   |

\*Give information separately for cases and controls in case-control studies and, if applicable, for exposed and unexposed groups in cohort and cross-sectional studies.

**Note:** An Explanation and Elaboration article discusses each checklist item and gives methodological background and published examples of transparent reporting. The STROBE checklist is best used in conjunction with this article (freely available on the Web sites of PLoS Medicine at <http://www.plosmedicine.org/>, Annals of Internal Medicine at <http://www.annals.org/>, and Epidemiology at <http://www.epidem.com/>). Information on the STROBE Initiative is available at [www.strobe-statement.org](http://www.strobe-statement.org).
